# Supplementary material for: Complete Rescue of HTLV-1p12KO Infectivity by Depletion of Monocytes Together with NK and CD8+ T Cells
Source: Pathogens. 2024 Mar 29;13(4):292. doi: 10.3390/pathogens13040292 (PMC11054408; doi:10.3390/pathogens13040292)
Supplement: Supplementary file 1 [file pathogens-13-00292-s001.zip]

Archive with 4 entries (4 files):
- Supplementary Figures 2-23-24.pdf
- Supplementary Material 2-23-24.pdf
- Table S3.xlsx
- Table S4.xlsx
