# Supplementary material for: Complete Rescue of HTLV-1p12KO Infectivity by Depletion of Monocytes Together with NK and CD8+ T Cells
Source: Pathogens. 2024 Mar 29;13(4):292. doi: 10.3390/pathogens13040292 (PMC11054408; doi:10.3390/pathogens13040292)
Supplement: Supplementary file 1 [file pathogens-13-00292-s001.zip › Supplementary Figures 2-23-24.pdf]

A

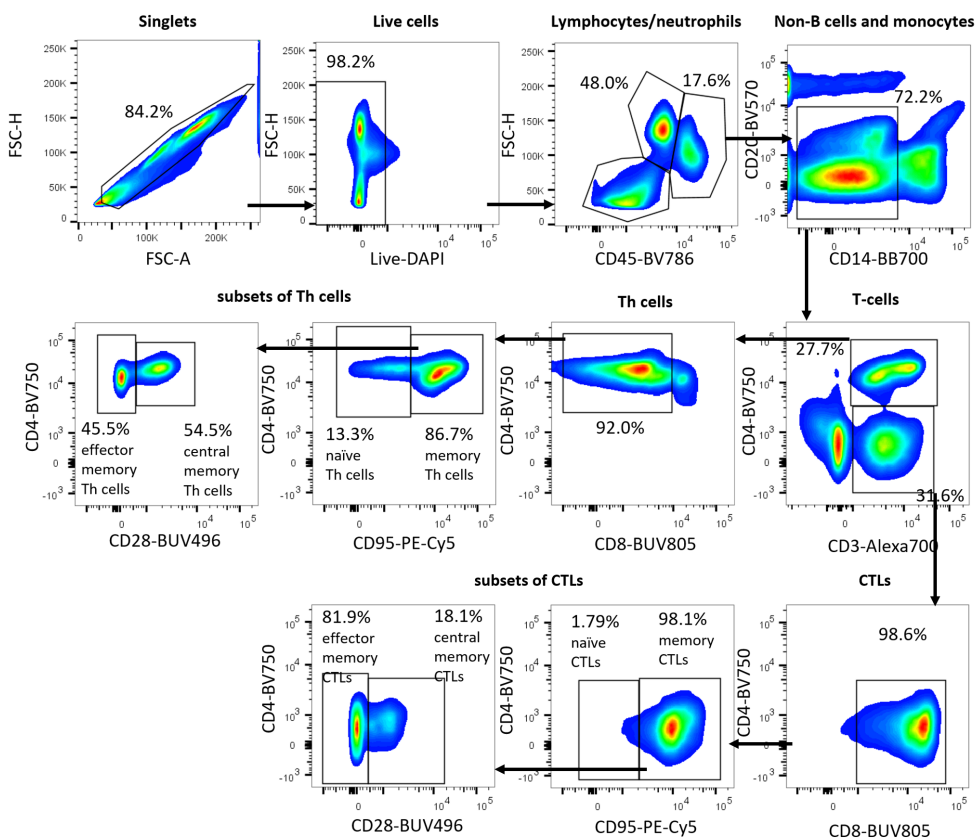

B

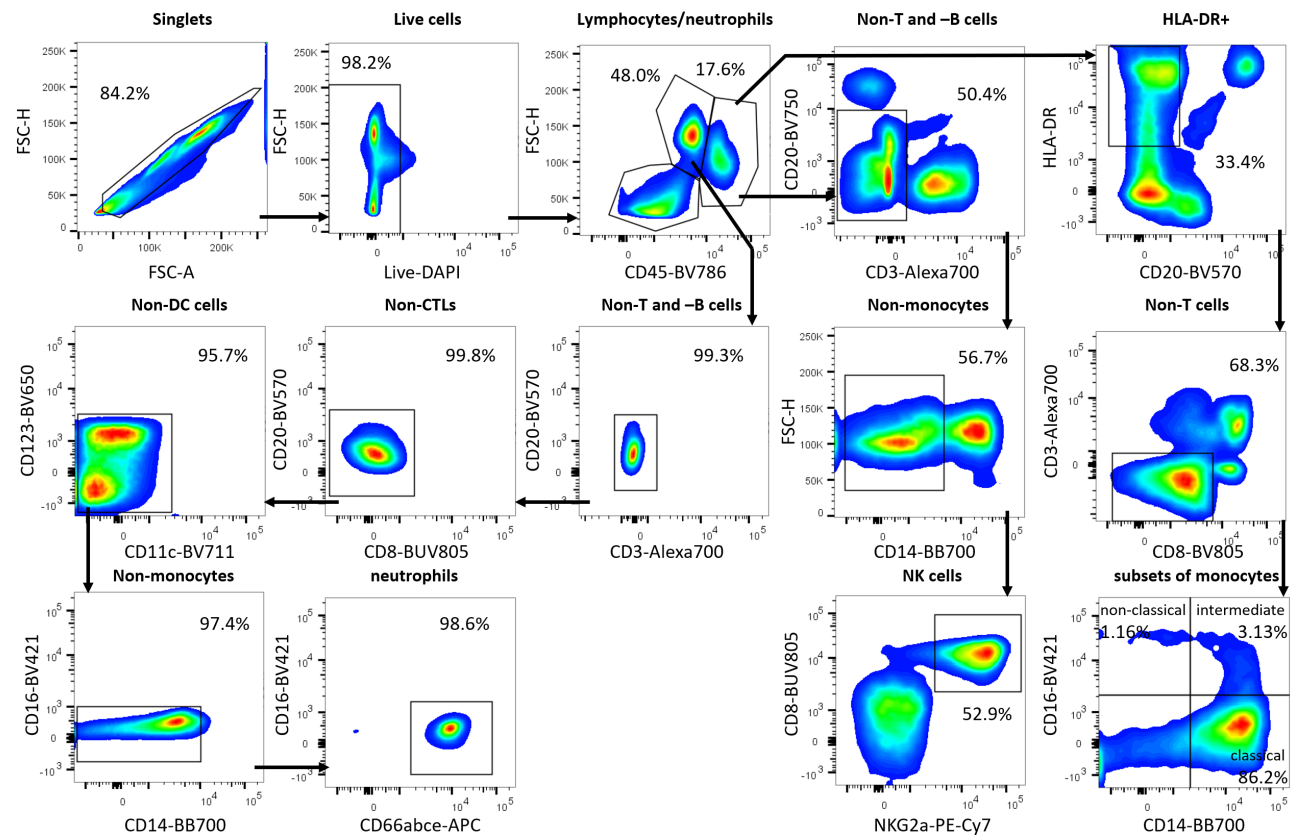

Figure S1

**A**

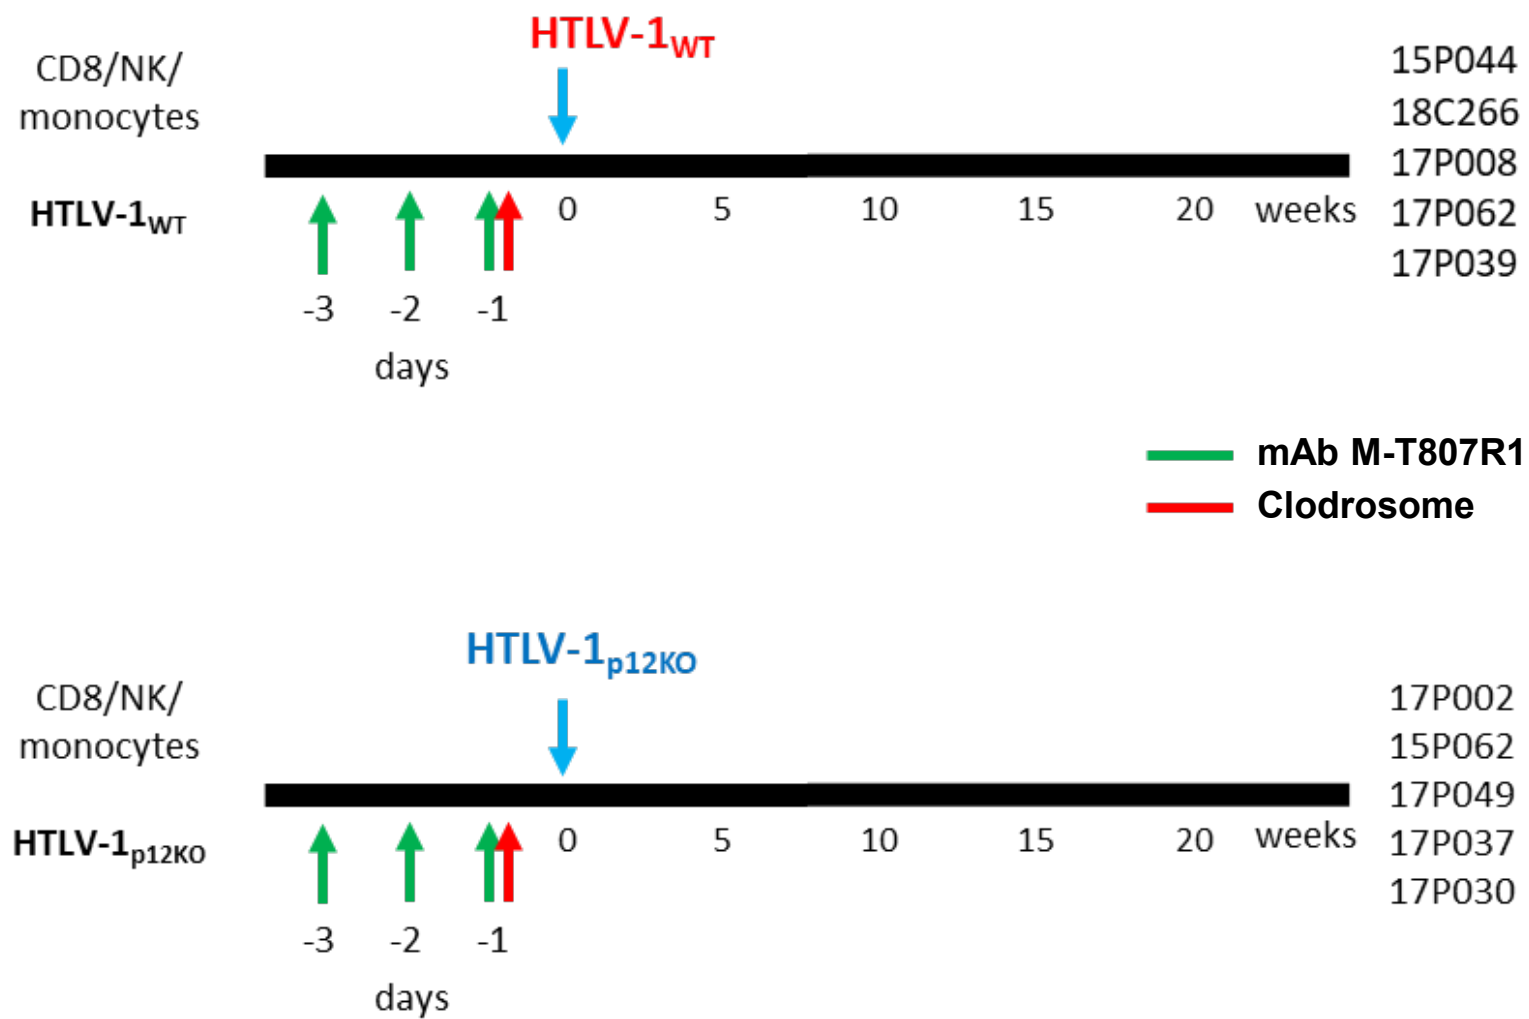

Figure S2

B

HTLV-1<sub>WT</sub>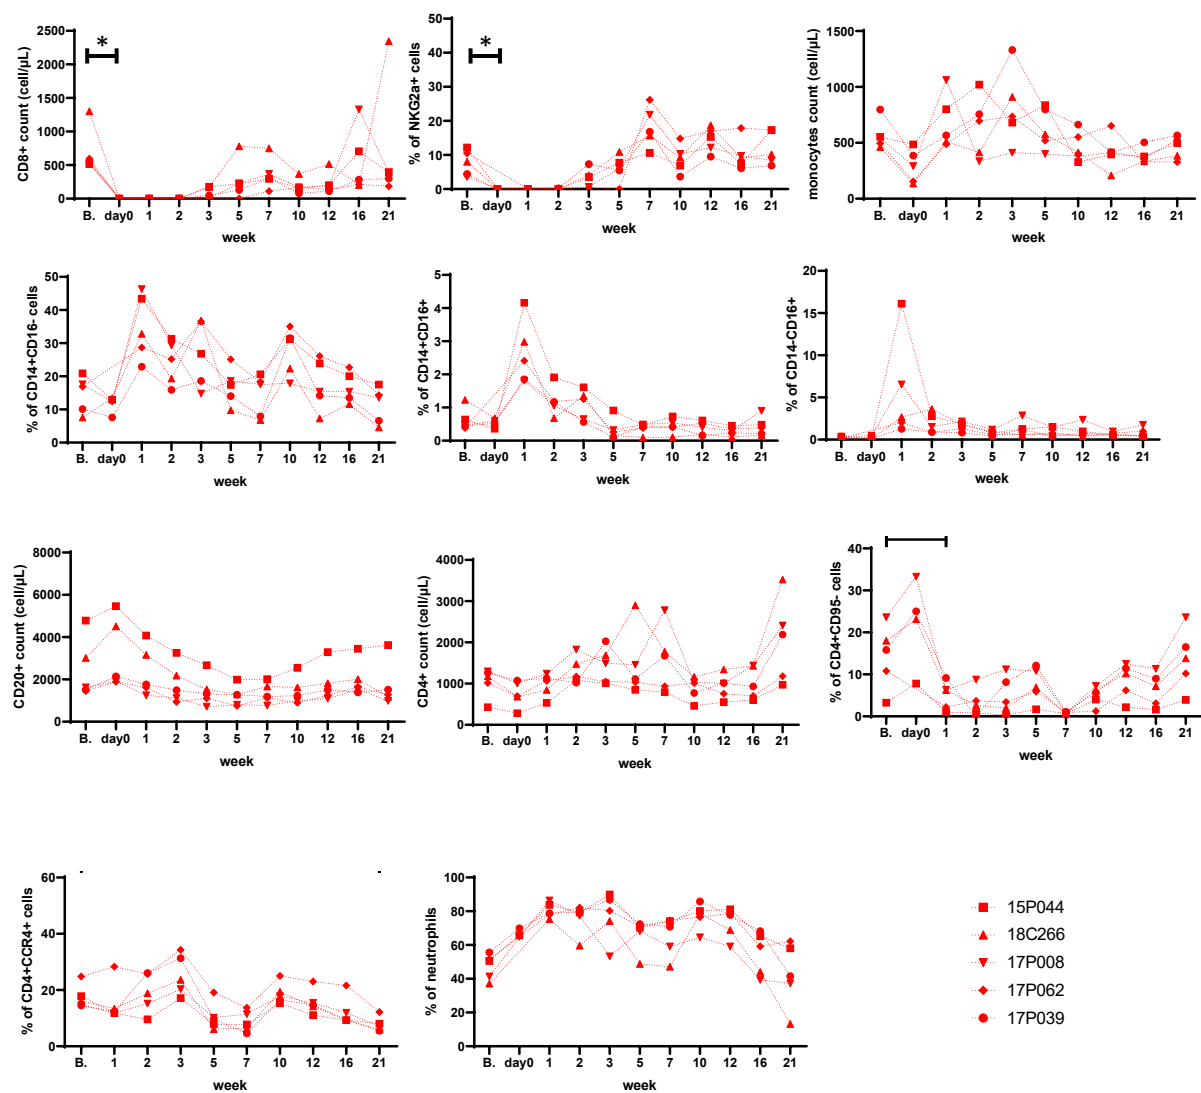

C

HTLV-1<sub>p12ko</sub>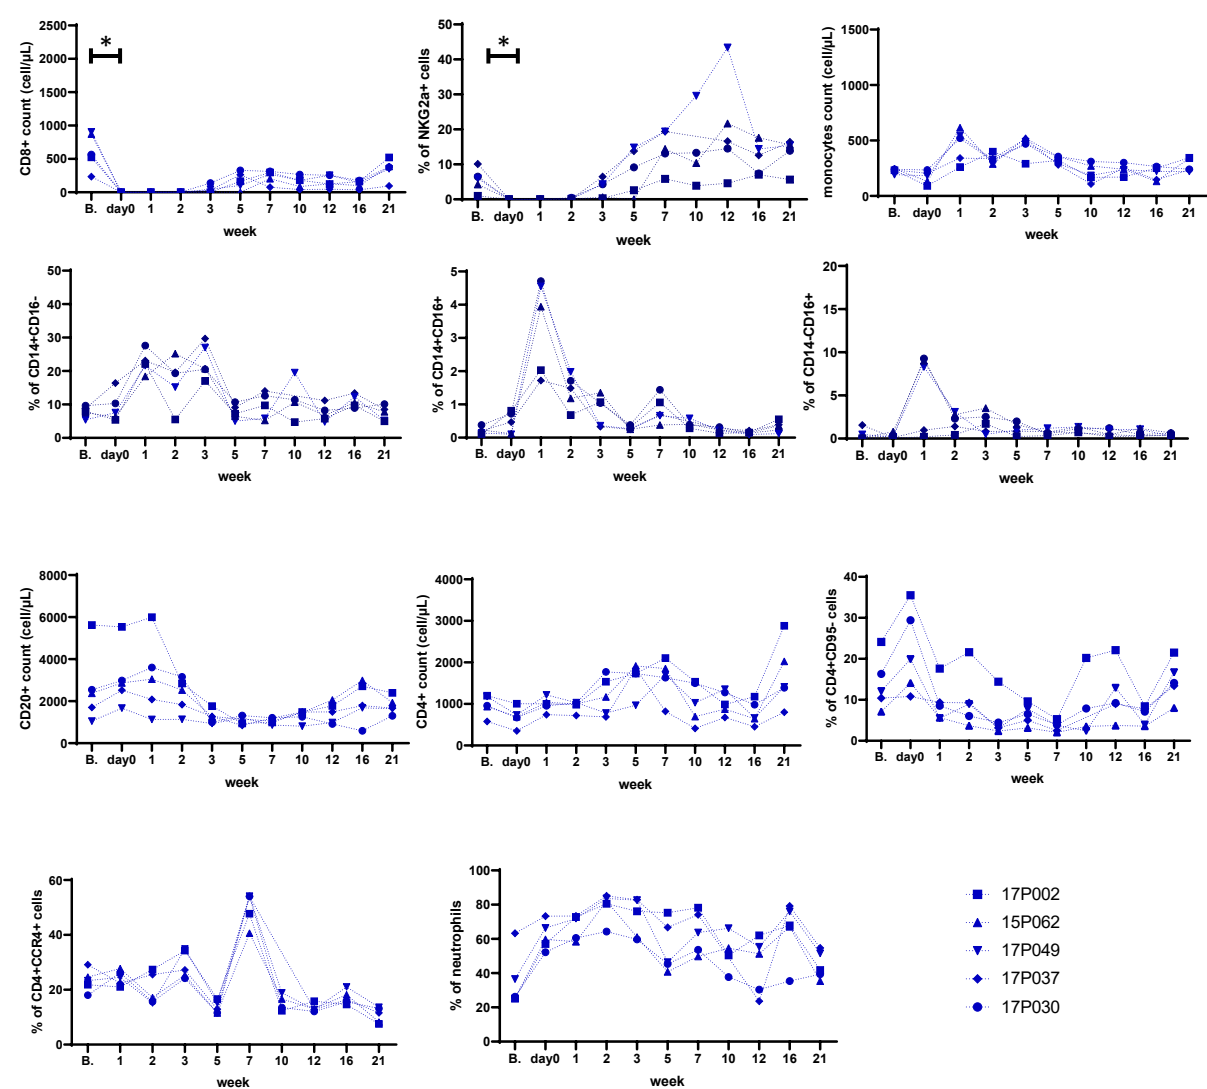

Figure S2

A

HTLV-1<sub>WT</sub>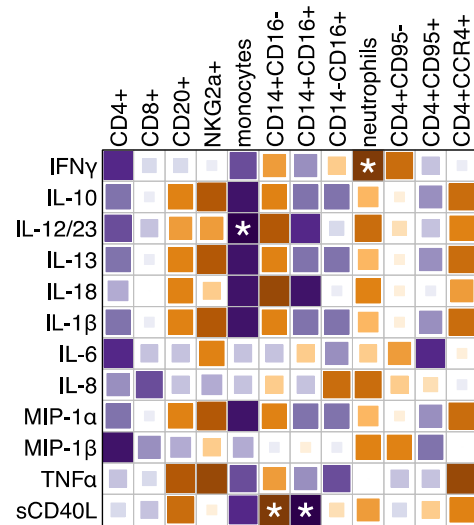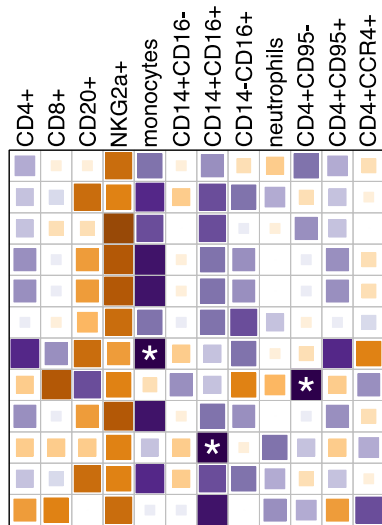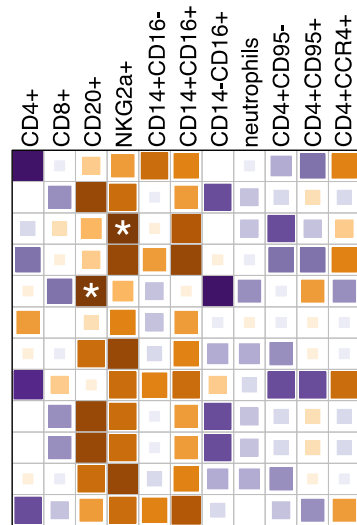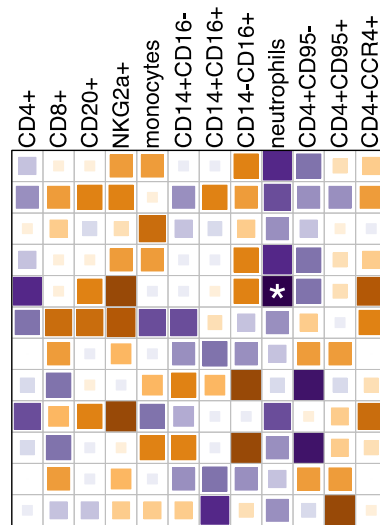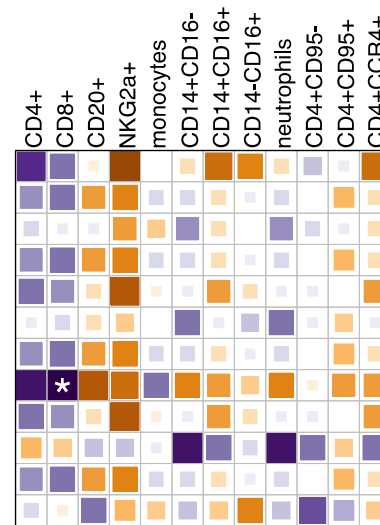Spearman  
correlation  
coefficient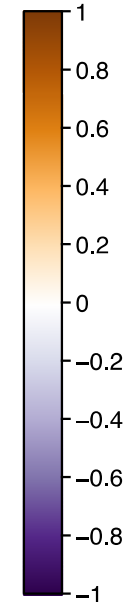

B

HTLV-1<sub>p12KO</sub>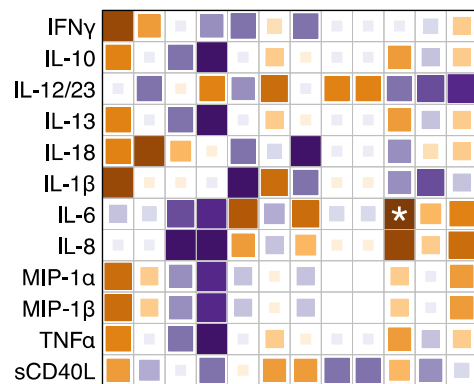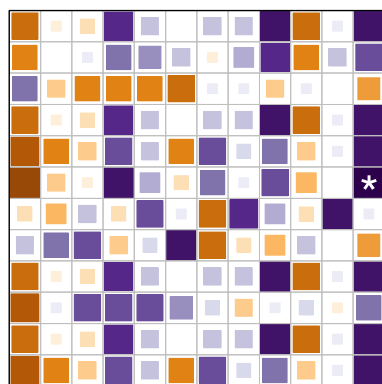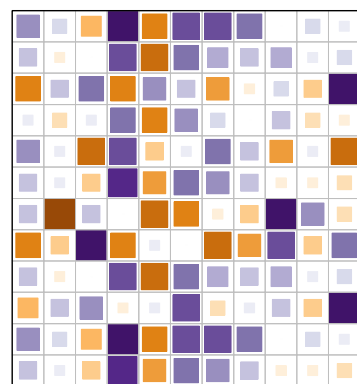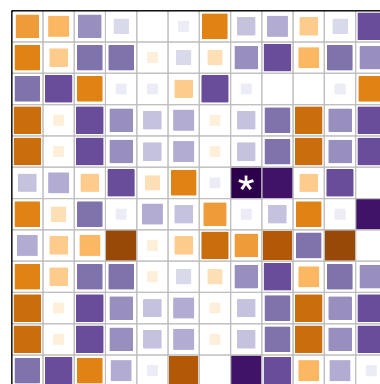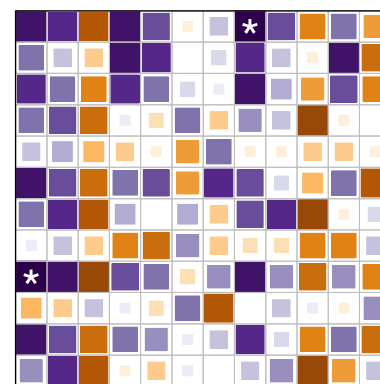

Week 2

Week 5

Week 7

Week 16

Week 21

Figure S3

C

| HTLV-1 <sub>WT</sub>                               |                                              |             |               | HTLV-1 <sub>p12KO</sub>                            |            |                |         |
|----------------------------------------------------|----------------------------------------------|-------------|---------------|----------------------------------------------------|------------|----------------|---------|
|                                                    |                                              |             |               |                                                    |            |                |         |
| cell population cytokine time interval vs baseline |                                              |             |               | cell population cytokine time interval vs baseline |            |                |         |
| first triple depletion                             | positive:<br>↑ cell population<br>↑ cytokine | CD14+CD16-  | sCD40L        | week 2                                             | CD4+CD95-  | IL-6           | week 2  |
|                                                    |                                              | neutrophils | IFN $\gamma$  | week 2                                             |            |                |         |
|                                                    |                                              | NKG2a+      | IL-12/23      | week 7                                             |            |                |         |
|                                                    |                                              | CD20+       | IL-18         | week 7                                             |            |                |         |
|                                                    | negative:<br>↑ cell population<br>↓ cytokine | monocytes   | IL-12/23      | week 2                                             | CD4+CCR4+  | IL-1 $\beta$   | week 5  |
|                                                    |                                              | monocytes   | IL-6          | week 5                                             | CD14+CD16+ | IL-1 $\beta$   | week 16 |
|                                                    |                                              | CD14+CD16+  | sCD40L        | week 2                                             | CD14-CD16+ | IFN $\gamma$   | week 21 |
|                                                    |                                              | CD14+CD16+  | MIP-1 $\beta$ | week 5                                             | CD4+       | MIP-1 $\alpha$ | week 21 |
|                                                    |                                              | neutrophils | IL-18         | week 16                                            |            |                |         |
|                                                    |                                              | CD4+CD95-   | IL-8          | week 5                                             |            |                |         |
|                                                    |                                              | CD8+        | IL-8          | week 21                                            |            |                |         |

Figure S3

A

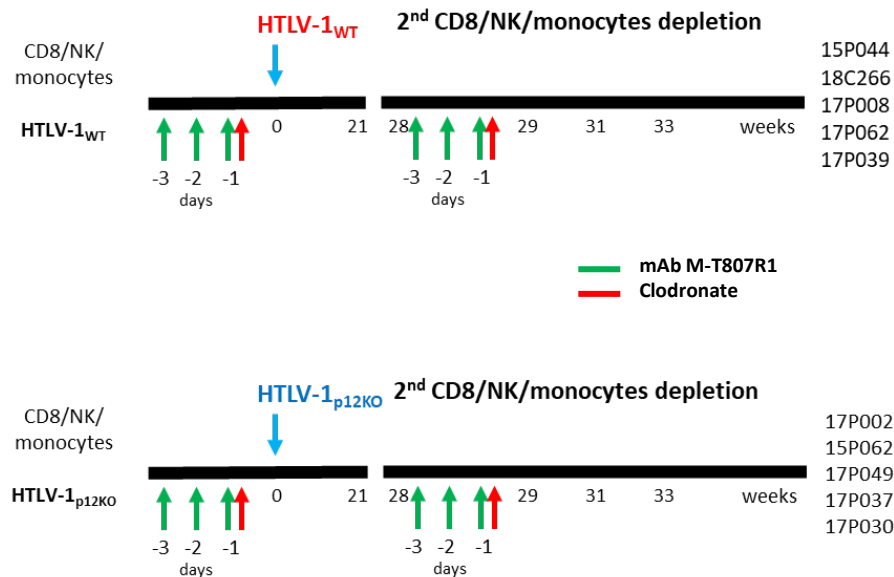

B

HTLV-1<sub>WT</sub>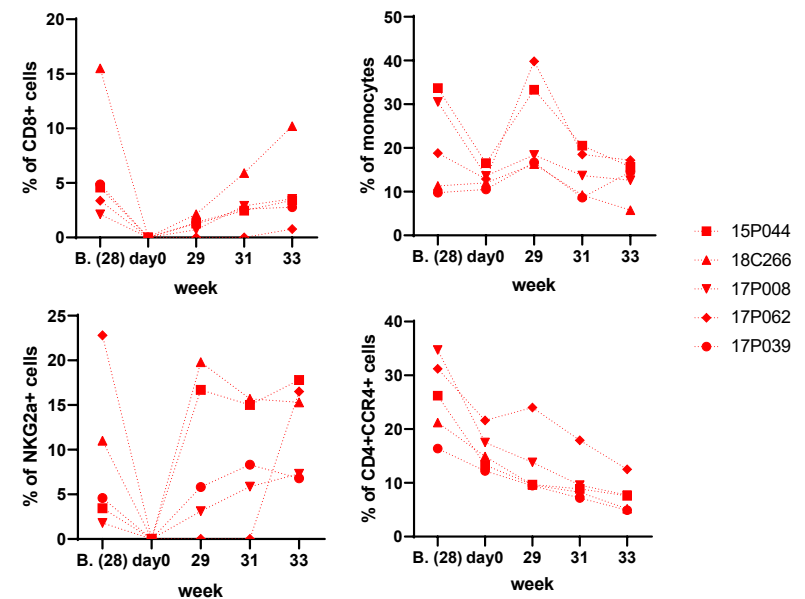HTLV-1<sub>p12KO</sub>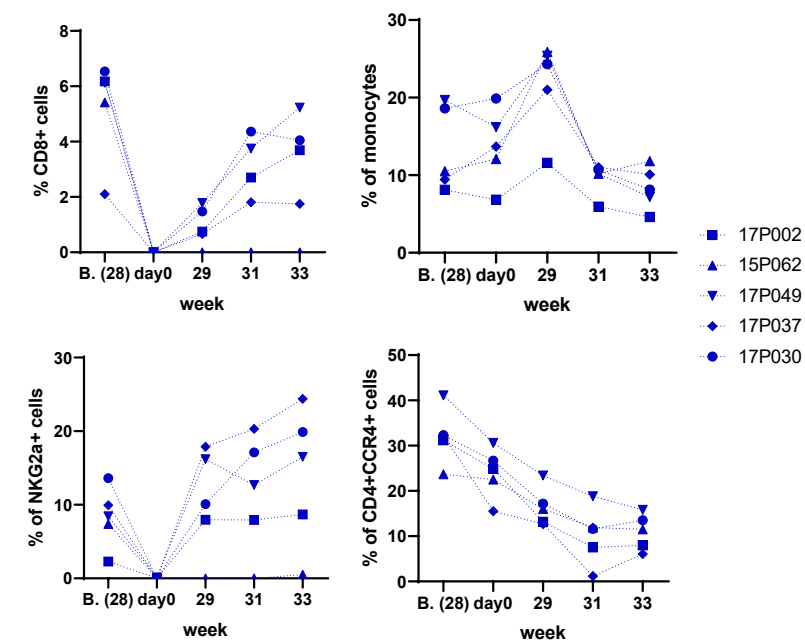

Figure S4

A

| group                | animal | PVL (%)               |       |         |         |         |
|----------------------|--------|-----------------------|-------|---------|---------|---------|
|                      |        | Baseline<br>(28 week) | day 0 | 29 week | 31 week | 33 week |
| HTLV-1 <sub>WT</sub> | 15P044 | 0.80                  | -     | -       | -       | -       |
|                      | 18C266 | -                     | 0.19  | -       | 0.23    | 0.04    |
|                      | 17P008 | -                     | 0.08  | -       | -       | -       |
|                      | 17P062 | -                     | 0.14  | 0.21    | -       | -       |
|                      | 17P039 | -                     | 0.73  | 1.00    | 0.51    | -       |

B

| group                   | animal | PVL (%)               |       |         |         |         |
|-------------------------|--------|-----------------------|-------|---------|---------|---------|
|                         |        | Baseline<br>(28 week) | day 0 | 29 week | 31 week | 33 week |
| HTLV-1 <sub>p12KO</sub> | 17P002 | -                     | 0.83  | -       | 0.29    | -       |
|                         | 15P062 | 0.10                  | 0.26  | 0.58    | -       | -       |
|                         | 17P049 | -                     | 0.18  | -       | -       | -       |
|                         | 17P037 | 0.17                  | -     | -       | -       | -       |
|                         | 17P030 | -                     | -     | 0.14    | -       | -       |

C

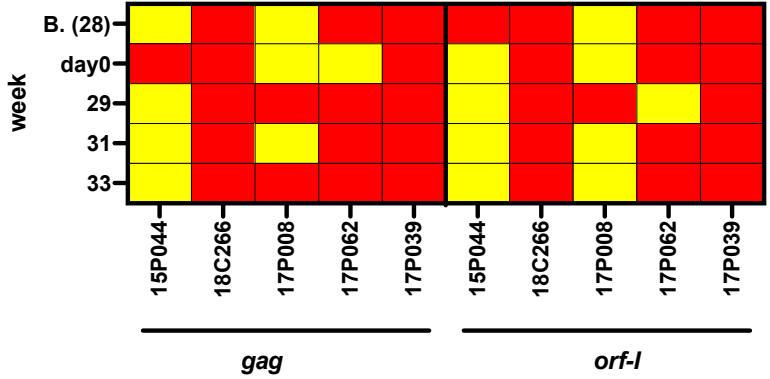

D

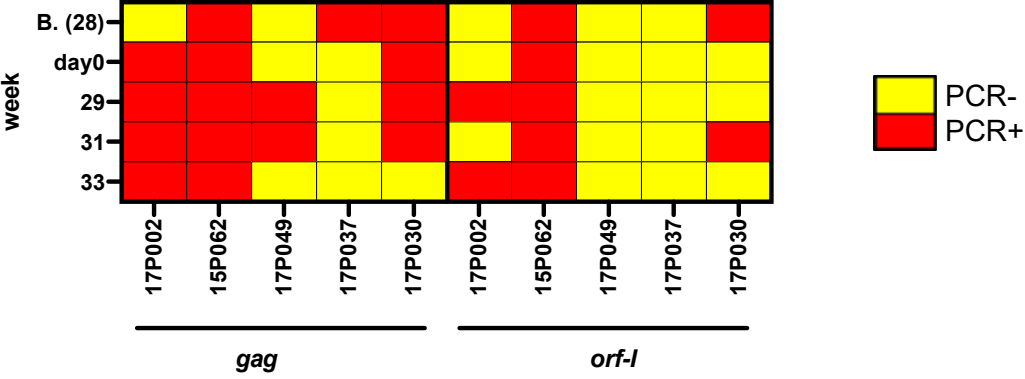

Figure S5

**A****HTLV-1<sub>WT</sub>**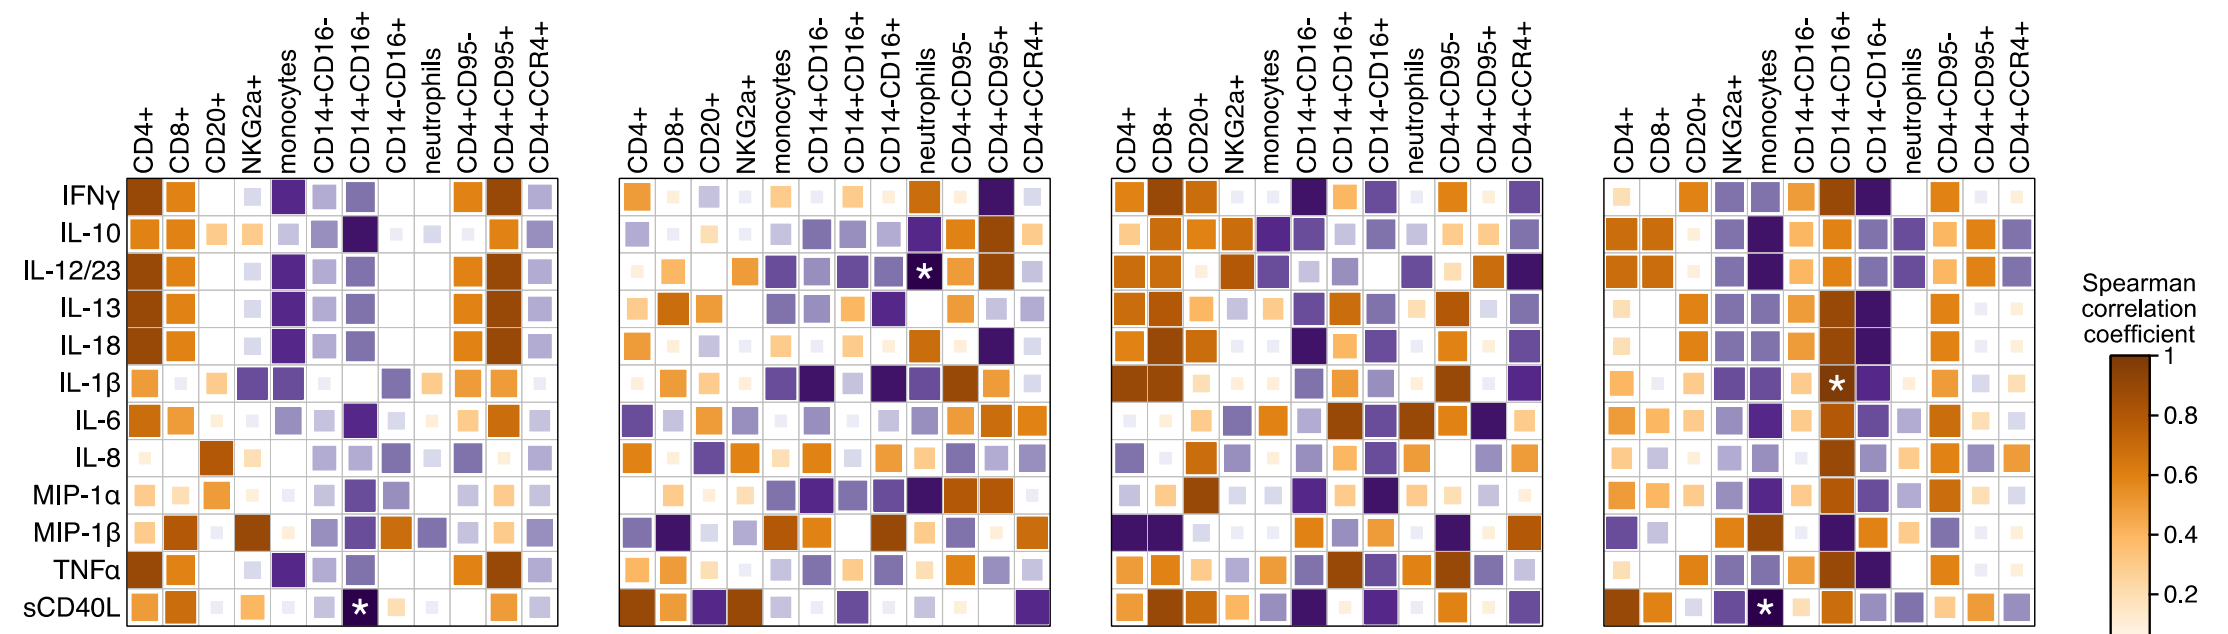**B****HTLV-1<sub>p12KO</sub>**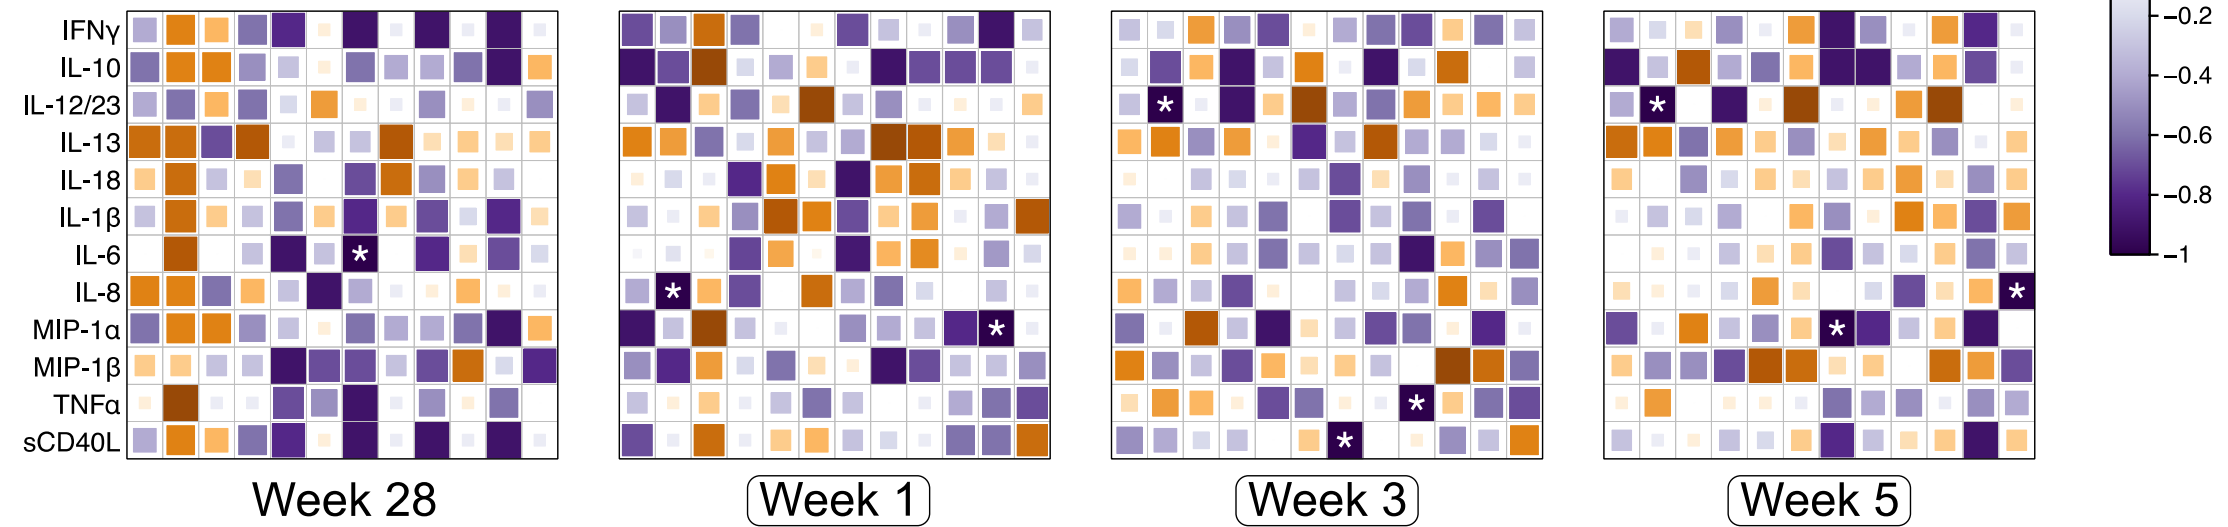

Figure S6

C

| HTLV-1 <sub>WT</sub>    |                                              |             |          | HTLV-1 <sub>p12KO</sub> |             |                           |         |
|-------------------------|----------------------------------------------|-------------|----------|-------------------------|-------------|---------------------------|---------|
|                         |                                              |             |          | cell population         | cytokine    | time interval vs baseline |         |
| second triple depletion | positive:<br>↑ cell population<br>↑ cytokine | CD14+CD16+  | IL-1β    | week 5                  |             |                           |         |
|                         |                                              | CD14+CD16+  | sCD40L   | week 28                 | CD14+CD16+  | IL-6                      | week 28 |
|                         |                                              | monocytes   | sCD40L   | week 5                  | CD14+CD16+  | sCD40L                    | week 3  |
|                         | negative:<br>↑ cell population<br>↓ cytokine | neutrophils | IL-12/23 | week 1                  | CD14+CD16+  | MIP-1α                    | week 5  |
|                         |                                              |             |          |                         | CD8+        | IL-8                      | week 1  |
|                         |                                              |             |          |                         | CD8+        | IL-12/23                  | week 3  |
|                         |                                              |             |          |                         | CD8+        | IL-12/23                  | week 5  |
|                         |                                              |             |          |                         | CD4+CCR4+   | IL-8                      | week 5  |
|                         |                                              |             |          |                         | CD4+CD95+   | MIP-1α                    | week 1  |
|                         |                                              |             |          |                         | neutrophils | TNFα                      | week 3  |

Figure S6

A

*orf-I*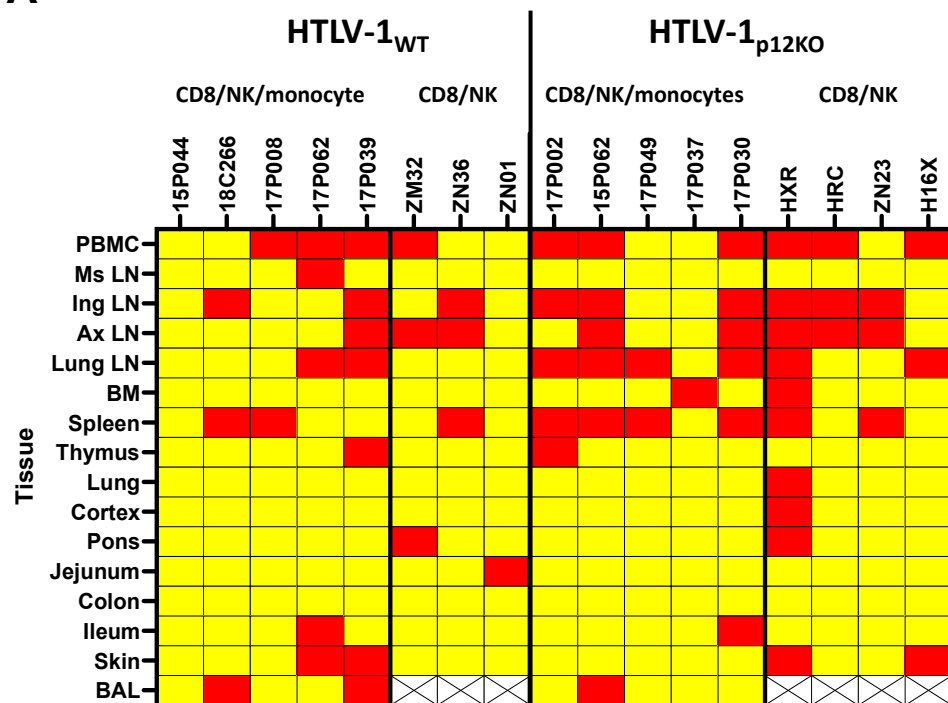

B

*gag*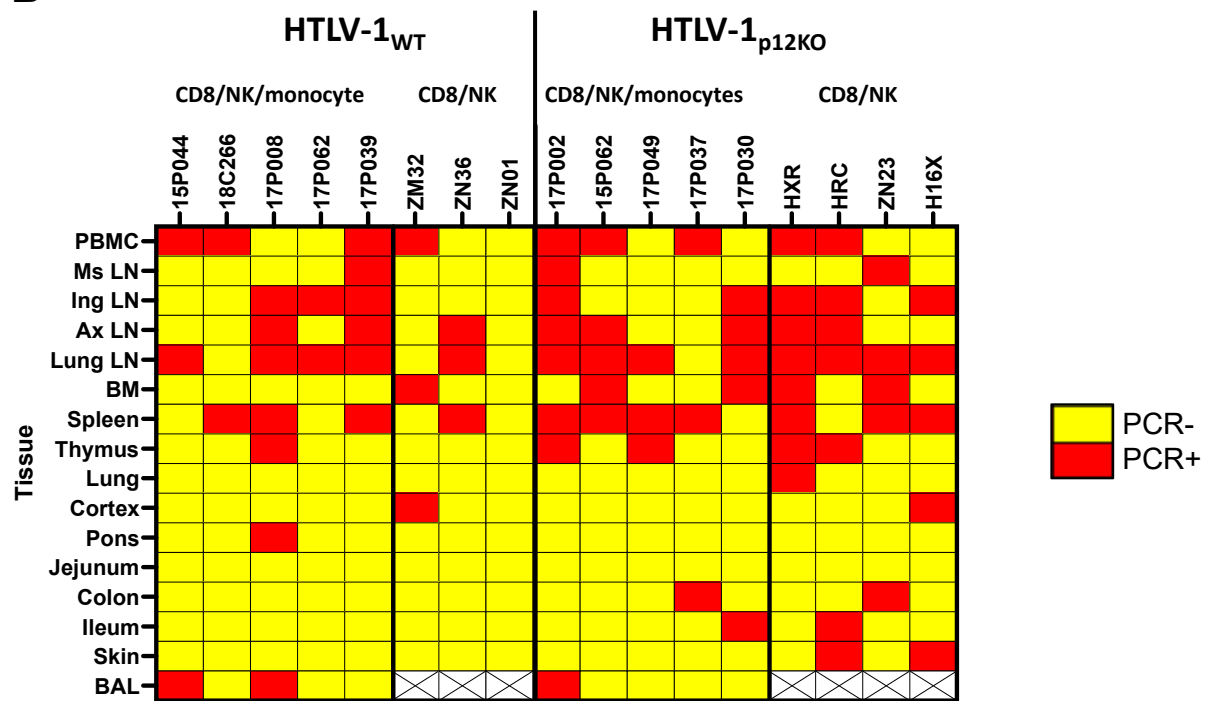

C

| group | animal | PVL (%) |      |        |       |       |        |         |        |      |       |         |       |        |      |      |      |
|-------|--------|---------|------|--------|-------|-------|--------|---------|--------|------|-------|---------|-------|--------|------|------|------|
|       |        | PBMC    | BM   | spleen | Ms LN | Ax LN | Ing LN | Lung LN | Cortex | Pons | Colon | Jejunum | Ileum | Thymus | Lung | Skin | BAL  |
| WT    | 15P044 | -       | -    | -      | -     | -     | -      | -       | 1.89   | -    | -     | -       | -     | -      | -    | -    | -    |
|       | 18C266 | -       | 0.44 | -      | -     | -     | -      | -       | -      | -    | -     | -       | -     | -      | -    | -    | 0.12 |
|       | 17P008 | -       | -    | -      | -     | -     | -      | -       | -      | -    | -     | -       | -     | -      | -    | -    | -    |
|       | 17P062 | -       | 0.44 | -      | -     | -     | -      | 0.07    | -      | -    | -     | -       | -     | -      | -    | -    | -    |
|       | 17P039 | -       | -    | -      | -     | 0.62  | 0.42   | 0.24    | 0.25   | 0.12 | 0.22  | 0.18    | 0.24  | 0.53   | -    | -    | 0.07 |
| p12KO | 17P002 | 0.01    | -    | 0.04   | -     | 0.01  | -      | -       | -      | -    | -     | -       | -     | -      | 0.3  | -    | -    |
|       | 15P062 | 0.56    | -    | -      | -     | -     | -      | -       | -      | -    | 0.16  | -       | -     | -      | -    | -    | -    |
|       | 17P049 | -       | -    | -      | -     | -     | -      | -       | -      | -    | -     | -       | -     | 0.08   | -    | -    | 0.71 |
|       | 17P037 | -       | -    | -      | 0.06  | -     | -      | -       | -      | -    | -     | -       | -     | -      | -    | -    | 2.51 |
|       | 17P030 | -       | -    | -      | 0.06  | 0.16  | 0.23   | 0.06    | -      | -    | 0.04  | 0.1     | -     | -      | -    | -    | -    |

Figure S7
