# Supplementary material for: Complete Rescue of HTLV-1p12KO Infectivity by Depletion of Monocytes Together with NK and CD8+ T Cells
Source: Pathogens. 2024 Mar 29;13(4):292. doi: 10.3390/pathogens13040292 (PMC11054408; doi:10.3390/pathogens13040292)
Supplement: Supplementary file 1 [file pathogens-13-00292-s001.zip › Table S3.xlsx]

## Sheet: Sheet1
Table S3. Cell frequency over time. Changes in phenotypic profiles of different cell populations in whole peripheral blood after first and second treatment with M-T807R1/Clodrosome of animals infected with HTLV-1WT or HTLV-1p12KO.
cell population	group	animal ID	Cell population frequency (%)
			B.	day 0	week 1	week 2	week 3	week 5	week 7	week 10	week 12	week 16	week 21	B. (week 28)	day 0	week 31	week 33	week 35
lymphocytes	HTLV-1WT	15P044	17.4	9.5	12.7	17.3	8.44	27.7	24	18.7	17.2	32.9	32.6	15.9	13.1	20.3	33.1	36.7
		18C266	30.4	3.73	12.6	24.7	23.3	47.9	50.5	20.5	24.6	50.6	70.1	41.5	30	35.3	54.3	68
		17P008	28.4	22.6	9.15	19	17.4	31.3	40.2	26	39.1	36.5	53.8	14.9	19.1	20.3	35.3	53.7
		17P062	21	-	18.3	14.6	18.8	27.3	24.3	23.3	17	37.9	31	35.2	14.3	23	40	36.3
		17P039	21.3	19.3	7.79	13.3	11.7	24	28.4	10.3	14.3	27.4	39.8	26	15.6	19.1	39.4	35.9
	HTLV-1p12KO	17P002	18.5	23.4	23	9.28	21.8	23.7	20.6	43.9	27.7	29.1	55.9	22.6	21.6	27	58.6	63.4
		15P062	24.8	22.9	36.8	14.6	35.5	57.4	48.4	40.8	45.3	30.5	58.1	53	18.6	33.5	56.3	50
		17P049	26.6	21.1	23.9	15.2	15.8	56.2	34.9	29.6	43.4	23.7	46.5	25.3	13.2	28.3	35.5	52.2
		17P037	14.7	12.8	22.4	11.3	15.5	31.3	24.5	-	9.41	18.5	41.5	20.6	16.3	21.7	32.8	33.3
		17P030	23.3	23.9	34.7	29.3	36.7	52.4	44	60.3	65.3	63	54.9	40.8	18	31.1	59.2	59.4
CD4+ cells	HTLV-1WT	15P044	19.5	30.8	17.5	41.6	14.4	28.2	28.2	23	23.2	20.9	26	22.2	54.4	22.3	28.2	29.4
		18C266	31.9	43.2	32.4	49.8	19.9	37.9	31	25.6	30.7	32.8	33	27.2	57.9	33.9	35.7	38.2
		17P008	37.4	50.3	20.4	30.3	37.6	25.9	17.4	21.1	28.3	34.3	38.8	17.4	46.9	39.7	40.1	40.4
		17P062	24.5	-	30.5	29	18.9	24.4	20.9	14	20.1	22.8	31.4	16.4	39.7	23.2	28.6	27.1
		17P039	35.2	53.1	45.1	48	37.4	41.5	42.9	24.9	37.7	44.5	54.7	46	57	46.4	50.7	50.1
	HTLV-1p12KO	17P002	49.4	60.4	58.2	66.9	48.5	43.3	32.4	49.8	49	48.5	52.6	43.7	68.7	53.3	56.1	55.7
		15P062	30.5	40.7	41	29	34.9	51.8	34	30.9	36	36.8	42	34.7	42	39	45.7	45.8
		17P049	33.1	44.1	35.9	36.6	23.3	36	24.1	28	32.1	27.1	38.8	27.7	48.5	28.7	33.8	33.8
		17P037	30.7	34.5	41.4	37.8	21.3	36.9	20.5	-	31.5	29.6	32.9	20.7	47.7	30.5	34.5	32
		17P030	40	45.8	39.3	39.1	38.9	39.3	30.9	41.1	31.1	24.5	33.7	26.9	48.3	33.5	34.8	37.6
CD4+CD95+ cells	HTLV-1WT	15P044	16.1	22.9	16.4	40.7	14.1	26.4	25.3	14	21.1	19.3	21.9	21	51	20.5	24.9	27.7
		18C266	13.8	20.2	26.2	47.1	17.9	30.9	29.6	19.4	20.5	25.5	18.9	25	46.9	26.3	25.1	29.9
		17P008	13.6	16.7	14.1	21.3	26.1	15	16.6	13.9	15.9	22.9	15	16	28.1	21	17.6	17.1
		17P062	13.5	-	28.2	25.4	15.5	18.5	20	12.7	13.9	19.5	20.9	16.1	36.1	19.3	22.5	22.5
		17P039	19.2	27.6	35.9	42.6	29.5	29.2	41.8	19.2	26.3	35.4	37.8	44.7	46.8	36.7	40.1	41.3
	HTLV-1p12KO	17P002	25	24.2	40.6	45.4	34.4	33.7	27.1	30.1	26.8	39.7	30.7	39.3	53.6	37.5	38.1	41.7
		15P062	23.4	26	35.5	25.4	32.4	48.6	31.8	27.2	32.4	33	33.8	32.9	39	33.9	39	38.8
		17P049	20.7	24	30.2	27.5	20.2	28.4	20.3	25.4	18.9	23	21.8	26.9	44.3	22.3	25.3	24.2
		17P037	20.3	23.3	32	28.5	18.2	27.3	18.1	-	22.5	21.8	19.4	19.2	38.7	20.2	24.3	23.7
		17P030	23.4	16.5	30.7	32.9	34.3	32.6	27	26.3	22	17.2	19.8	25.1	41.2	24.3	26.5	25.1
CD4+CD95+CD28+ cells	HTLV-1WT	15P044	8.72	17.2	9.67	10.7	4.8	10.7	10.7	6.39	11	8.73	8.9	16	23.3	7.87	12.1	8.62
		18C266	9.14	12.8	13.1	15.6	7.81	8.77	6.68	11.8	9.74	8.67	5.62	13.8	19	11.3	10.5	6.68
		17P008	11.8	14.1	11.2	13.8	13.1	10.5	7.21	11.7	11.5	17.3	9.25	15.4	20.9	17.9	14.1	9.76
		17P062	11.1	-	21.6	12	9.72	13.3	7.98	9.06	11.5	13.3	10.7	11.5	22.3	13.2	15.1	9.24
		17P039	11	17.5	21.1	12.4	14	16.6	8.29	15.4	17.1	17.5	12.9	20.6	25.2	17.7	16.8	11.1
	HTLV-1p12KO	17P002	19.4	22.8	39.3	39.3	24.5	22.2	14.3	21.2	22.2	25.4	13.3	31.9	39.6	16.5	18.3	14.7
		15P062	14.1	19.2	22.1	12	11.4	15.6	7.19	15.3	13.9	18.6	10.6	18.1	21.8	14.2	14.3	13.7
		17P049	13.1	20	23.2	16.4	12.1	15.2	10.8	19.8	12.6	16.2	12.9	22.7	31.7	15.9	19.9	13.1
		17P037	15.7	21.3	30.4	21.3	11.9	14.6	9.97	-	18.3	18.3	12.7	16.1	28.1	15.1	18.9	14.9
		17P030	15.1	14.7	24.2	17.9	15.2	13	13.3	14.7	12.2	11.6	11	16.2	35.2	16.5	15.5	13.4
CD4+CD95+CD28- cells	HTLV-1WT	15P044	7.35	5.57	6.68	29.9	9.28	15.6	15.8	2.34	9.99	10.5	12.9	4.97	27.5	12.5	12.7	19
		18C266	4.62	7.27	13.3	31.1	9.99	22	22.8	7.56	10.6	16.7	13.1	11.1	27.6	15	14.5	23.1
		17P008	1.81	2.5	2.8	7.46	12.9	4.49	9.29	2.17	4.36	5.63	5.67	0.52	25.3	2.98	19.4	7.26
		17P062	2.3	-	6.58	13.3	5.71	5.22	11.9	3.58	2.3	6.21	10.2	4.63	13.7	5.96	7.41	13.2
		17P039	8.16	10.1	14.7	30	15.4	12.5	33.4	3.8	9.09	18	24.8	24	21.5	18.9	23.2	30.1
	HTLV-1p12KO	17P002	5.54	1.33	1.23	6.03	9.72	11.4	12.6	8.87	4.6	14.2	17.4	7.42	16.6	20.9	19.9	27
		15P062	9.33	6.8	13.3	13.3	21	32.9	24.6	11.9	18.5	14.5	23.2	14.7	17.1	19.5	24.7	25.1
		17P049	7.6	4.03	7	11	8.03	13	9.32	5.38	6.2	6.76	8.84	4.14	12.5	6.33	5.38	11
		17P037	4.48	1.95	1.47	7	6.2	12.6	7.94	-	4.15	3.47	6.59	3.07	10.4	4.99	5.49	8.75
		17P030	8.23	1.77	6.35	14.8	18.9	19.5	13.5	11.5	9.75	5.53	8.74	8.81	14.5	7.75	10.9	11.6
CD4+CD95- cells	HTLV-1WT	15P044	3.26	7.8	1.03	0.77	0.28	1.69	0.64	4	2.17	1.62	3.9	1.1	3.38	1.95	3.25	1.69
		18C266	18	23.1	6.24	2.61	1.97	6.9	0.65	6.27	10.2	7.17	13.8	2.15	11	7.43	10.8	8.28
		17P008	23.6	33.3	6.3	8.79	11.2	10.8	0.77	7.24	12.5	11.3	23.6	1.27	18.8	18.7	22.9	23.3
		17P062	10.8	-	2.23	3.67	3.43	5.88	0.9	1.24	6.21	3.13	10.2	0.31	3.57	3.78	6.03	4.61
		17P039	15.8	25	9.16	0.011	8.14	12.1	1.07	5.64	11.4	8.99	16.5	1.32	9.76	9.71	10.6	8.84
	HTLV-1p12KO	17P002	24.1	35.5	17.6	21.6	14.4	9.6	5.28	20.2	22.1	8.42	21.5	4.16	11.9	15.8	18	13.9
		15P062	7.1	14.1	5.64	3.67	2.38	3.16	2.06	3.52	3.7	3.58	8.03	2.01	2.96	5.03	6.42	7.15
		17P049	12.1	19.9	5.52	8.95	3.1	7.79	3.77	2.41	12.9	3.94	16.7	0.9	4.15	6.17	8.46	9.6
		17P037	10.4	10.8	9.35	9.24	3.15	5.03	2.47	-	9	7.8	13.4	1.5	8.96	0.43	9.89	8.28
		17P030	16.3	29.4	8.54	6.04	4.46	6.52	3.88	7.88	9.21	7.11	14.1	1.74	6.89	8.95	8.26	12.5
CD4+CCR4+ cells	HTLV-1WT	15P044	17.8	-	11.8	9.57	17.1	7.84	7.77	15.3	11.1	9.34	8	26.2	13.3	9.67	8.89	7.59
		18C266	16.2	-	13.4	18.9	23.6	6.08	6.43	19.4	14.2	9.46	5.93	21.2	14.9	9.62	8.25	5.18
		17P008	14.6	-	11.8	15.2	20.3	10.2	11.4	17.8	15.4	11.9	7.19	34.7	17.5	13.8	9.58	7.73
		17P062	24.8	-	28.3	25.7	34.3	19.1	13.7	25	23	21.6	12.2	31.2	21.6	24	17.9	12.5
		17P039	14.5	-	12.3	26	31.3	9.82	4.6	16.5	14.7	9.32	5.55	16.4	12.2	9.49	7.17	4.91
	HTLV-1p12KO	17P002	21.8	-	21	27.4	34.3	16.6	47.7	12.3	15.8	14.6	7.53	31.2	24.9	13.2	7.51	7.99
		15P062	24.6	-	27.7	17.1	25.3	11.5	40.6	16.6	13	18.2	8.23	23.7	22.5	16	11.9	11.5
		17P049	23.3	-	24.5	15.2	34.9	15.2	54.1	18.9	12.8	21	13.6	41.1	30.6	23.4	18.8	15.8
		17P037	29.1	-	22.4	25.5	27.2	12.9	54	-	12.8	16.4	11.6	32.3	15.5	12.7	1.17	6.05
		17P030	18	-	26.1	15.6	24.2	11.6	54	13.5	12.1	15.6	13.2	32.3	26.7	17.2	11.6	13.5
CD8+ cells	HTLV-1WT	15P044	20.9	0.89	0.43	1.35	0.43	2.59	3.14	4	4.41	8.18	8.2	4.57	0	1.28	2.45	3.4
		18C266	33.5	0.85	0.47	0.68	0.078	8.22	12.7	9.57	13.7	17.9	23.9	15.5	0	2.14	5.9	10.2
		17P008	15.6	0.47	0.35	0.44	0.046	2.73	8.45	4.53	6.31	6.42	6.27	2.12	0	0.71	2.9	3.54
		17P062	15	-	0.83	0.94	0	0	2.34	1.92	2.82	3.33	3.78	3.38	0	0	0	0.77
		17P039	18.2	0.4	0.45	0.73	0.93	1.56	1.69	1.54	2.47	3.5	4.58	4.88	0	1.37	2.61	2.78
	HTLV-1p12KO	17P002	20	0.37	0.2	0.69	2.92	2.94	3.16	4.75	4.57	6.72	8.91	6.18	0	0.75	2.7	3.69
		15P062	33.4	0.64	0.42	0.94	4.03	0	0.67	2.25	2.86	4.1	5.76	5.42	0	0	0	0
		17P049	25.5	0.7	1.51	0.62	1.11	4.65	4.12	5.43	5.9	5.86	9.19	6.12	0	1.78	3.75	5.23
		17P037	11.2	0.93	0.76	0.45	1.41	1.47	1.32	-	2.37	2.42	3.37	2.1	0	0.66	1.81	1.75
		17P030	19.7	0.46	0.48	2.05	2.57	6.63	6.03	6.99	6.72	5.32	8	6.54	0	1.48	4.36	4.05
CD8+CD95+ cells	HTLV-1WT	15P044	20	0.86	0.38	1.35	0.42	2.46	3.11	3.96	4.34	8.15	8.12	4.22	0	1.25	2.32	3.2
		18C266	20.9	0.58	0.46	0.67	0.078	7.93	12.7	9.42	13.4	17.4	22.5	13.5	0	1.74	5.28	9.39
		17P008	11.9	0.43	0.35	0.44	0.044	2.67	8.45	4.5	6.22	6.38	6.03	2.01	0	0.61	2.6	3
		17P062	12.1	-	0.82	0.91	0	0	2.33	1.9	2.77	3.27	3.4	3.29	0	0	0	0.76
		17P039	14.3	0.38	0.45	0.72	0.93	1.54	1.67	1.51	2.38	3.45	4.28	4.77	0	1.29	2.52	2.64
	HTLV-1p12KO	17P002	17.4	0.35	0.2	0.69	2.87	2.89	3.06	4.65	4.38	6.63	8.66	5.85	0	0.66	2.52	3.46
		15P062	29.3	0.63	0.38	0.91	3.9	0	0.67	2.21	2.82	4.06	5.6	5.13	0	0	0	0
		17P049	21.2	0.68	1.5	0.6	1.04	4.01	3.55	5.36	4.94	4.43	6.57	3.91	0	1.47	3.29	4.13
		17P037	9.99	0.78	0.73	0.42	1.3	1.28	1.13	-	2.14	1.99	2.51	1.61	0	0.49	1.59	1.32
		17P030	15	0.42	0.47	2.04	2.5	6.43	5.9	6.97	6.55	5.12	7.37	6.15	0	1.3	4.24	3.83
CD8+CD95+CD28+ cells	HTLV-1WT	15P044	3.03	0.83	0.17	0.51	0.13	1	0.85	1.33	1.24	1.35	1.27	2.11	0	0.67	1.09	0.99
		18C266	4.14	0.53	0.18	0.37	0.032	1.13	0.8	1.73	1.9	1.4	1.4	1.94	0	0.59	1.37	1.13
		17P008	2.95	0.39	0.088	0.27	0.037	1.19	0.78	1.23	1.4	1.82	1.3	1.16	0	0.26	0.82	0.82
		17P062	5.83	-	0.33	0.6	0	0	1.38	1.21	1.83	1.95	1.75	1.8	0	0	0	0.46
		17P039	3.93	0.35	0.11	0.35	0.11	0.83	0.48	0.71	1.05	1.25	0.97	1.62	0	0.41	0.74	0.62
	HTLV-1p12KO	17P002	4.46	0.29	0.032	0.51	1.59	1.5	0.92	1.37	1.72	1.57	1.34	2.41	0	0.33	0.69	0.65
		15P062	5.02	0.59	0.19	0.6	1.86	0	0.36	1.06	1.15	1.7	1.04	2.1	0	0	0	0
		17P049	3.89	0.64	0.85	0.39	0.5	2.32	1.81	2.79	2.57	2.31	2.2	2.77	0	0.93	1.64	1.48
		17P037	5.61	0.74	0.39	0.32	0.37	0.73	0.71	-	1.49	1.26	1.3	1.02	0	0.3	0.87	0.67
		17P030	5.53	0.36	0.16	0.53	0.58	1.8	1.88	2.03	2.14	2.29	2.44	2.52	0	0.73	2.12	1.79
CD8+CD95+CD28- cells	HTLV-1WT	15P044	16.9	0.024	0.17	0.79	0.29	1.45	2.23	2.61	3.06	6.76	6.79	2.09	0	0.54	1.21	2.19
		18C266	16.7	0.05	0.25	0.27	0.044	6.76	11.8	7.66	11.4	16	21	11.6	0	1.14	3.87	8.22
		17P008	8.88	0.032	0.23	0.15	0	1.46	7.64	3.25	4.78	4.52	4.68	0.83	0	0.33	1.76	2.16
		17P062	6.26	-	0.44	0.29	0	0	0.92	0.68	0.91	1.3	1.61	1.47	0	0	0	0.3
		17P039	10.3	0.023	0.3	0.34	0.82	0.69	1.18	0.79	1.29	2.16	3.28	3.09	0	0.86	1.77	2
	HTLV-1p12KO	17P002	12.8	0.041	0.15	0.19	1.27	0.084	2.06	3.26	2.63	5.04	7.28	3.41	0	0.3	1.82	2.79
		15P062	24.2	0.023	0.14	0.29	2.01	0.02	0.31	1.13	1.66	2.33	4.52	3	0	0	0	0
		17P049	17.2	0.023	0.51	0.19	0.54	0.045	1.65	2.53	2.33	2.08	4.3	1.1	0	0.5	1.61	2.62
		17P037	4.33	0.028	0.29	0.092	0.92	0.043	0.38	-	0.65	0.72	1.18	0.57	0	0.19	0.71	0.65
		17P030	9.33	0.047	0.27	1.49	1.91	0.026	3.85	4.79	4.36	2.79	4.68	3.6	0	0.52	2.07	1.98
CD8+CD95- cells	HTLV-1WT	15P044	0.91	0.029	0.047	0	0	0.13	0.025	0.021	0.05	0.02	0.061	0.28	0	0.031	0.092	0.21
		18C266	12.4	0.26	0	0.012	0	0.29	0.036	0.098	0.33	0.38	1.3	1.72	0	0.29	0.65	0.94
		17P008	3.57	0.036	0	0	0	0.054	0	0.014	0.089	0.027	0.2	0.046	0	0.082	0.31	0.55
		17P062	2.73	-	0	0.026	0	0	0	0.01	0.047	0.053	0.33	0.056	0	0	0	0
		17P039	3.69	0.013	0	0.011	0	0.028	0.016	0.02	0.086	0.042	0.28	0.079	0	0.078	0.081	0.13
	HTLV-1p12KO	17P002	2.41	0.017	0	0	0.047	0.047	0.084	0.083	0.17	0.087	0.22	0.23	0	0.072	0.19	0.25
		15P062	3.85	0.015	0.039	0.026	0.13	0	0	0.022	0.042	0.06	0.14	0.22	0	0	0	0
		17P049	4.15	0.023	0.014	0.018	0.066	0.64	0.52	0.049	0.89	1.34	2.58	2.2	0	0.28	0.46	1.16
		17P037	1.21	0.15	0.015	0.018	0.11	0.19	0.19	-	0.22	0.45	0.83	0.45	0	0.14	0.23	0.45
		17P030	4.55	0.037	0	0	0.063	0.2	1.92	0.1	0.15	0.17	0.57	0.32	0	0.18	0.13	0.23
NKG2a+ cells	HTLV-1WT	15P044	12.2	0	0	0.014	3.52	7.74	10.6	6.88	15.3	7.44	17.3	3.45	0.029	16.7	15	17.8
		18C266	8	0.038	0.018	0.077	4.05	10.9	15.7	9.26	18.7	9.09	10.2	11	0.034	19.8	15.7	15.3
		17P008	3.58	0	0	0.056	0.6	6.04	21.8	10.3	12.2	9.71	8.39	1.8	0.013	3.11	5.87	7.3
		17P062	10.5	-	0	0.11	0.42	0.01	26.2	14.8	17	17.9	17.3	22.8	0.037	0.013	0.013	16.5
		17P039	4.4	0.023	0	0.17	7.32	5.48	16.8	3.64	9.51	6.1	6.91	4.59	0	5.83	8.33	6.8
	HTLV-1p12KO	17P002	0.97	0	0	0.018	0.3	2.59	5.86	3.9	4.59	7.07	5.63	2.29	0	7.97	7.93	8.7
		15P062	4.25	0	0	0.11	0.6	0	14.4	10.4	21.7	17.6	15.6	7.38	0	0.011	0	0.51
		17P049	5.99	0	0	0.2	4.31	14.8	19.4	29.6	43.4	14.4	15.4	8.45	0.13	16.2	12.7	16.5
		17P037	10.1	0.014	0	0.092	6.46	13.8	19.4	-	16.6	12.6	16.4	9.95	0.016	17.9	20.3	24.4
		17P030	6.49	0	0	0.42	4.3	9.14	13.1	13.3	14.5	7.39	13.9	13.6	0	10.1	17.1	19.9
monocytes	HTLV-1WT	15P044	23.9	16.1	65.7	39.8	32.6	20.8	23.5	38.5	27.5	22	19.1	33.7	16.5	33.3	20.5	15.7
		18C266	8.88	14.9	40.9	26.1	47.7	11.8	8.1	27.3	8.63	12.8	5.62	11.3	12	16.3	9.24	5.78
		17P008	20.2	14.8	56.3	34.1	19.4	21.5	22.5	22.1	19.3	17.6	17	30.5	13.6	18.4	13.7	12.6
		17P062	19.2	-	35	30	42.6	28	21.3	39.2	29.4	25.3	17.2	18.8	12.9	39.8	18.5	17.2
		17P039	10.8	9.24	28.4	19.9	22.3	15.7	10.4	35.6	17.9	15.5	8.47	9.75	10.5	16.7	8.63	14.5
	HTLV-1p12KO	17P002	8.97	6.97	25.4	7.46	21.4	9.17	11.7	10.2	7.49	11.2	6.47	8.12	6.85	11.6	5.93	4.62
		15P062	9.19	7.77	32.7	30	30.5	9.82	7.77	19.3	8.84	12.8	9.45	10.5	12.1	25.9	10.2	11.8
		17P049	7.87	10.1	36.9	23.1	34.4	7.08	8.57	25	7.3	15.8	6.32	19.7	16.2	25.4	10.2	7.18
		17P037	10.7	18.5	27.7	24.3	38.6	12.1	16.7	-	14.6	15.4	11	9.45	13.7	21	11	10.1
		17P030	11.1	12.1	42.5	24.5	25.4	13.9	15.6	23	10.6	10.1	11.5	18.6	19.9	24.3	10.7	8.13
CD14+CD16-	HTLV-1WT	15P044	20.9	12.9	43.4	31.3	26.8	17.4	20.6	31.2	23.9	20.01	17.5	29.1	14.9	27.1	16.8	13
		18C266	7.57	13.4	32.8	19.3	36.8	9.75	6.81	22.3	7.28	11.6	4.56	9.4	10.9	12.1	7.58	4.47
		17P008	17.6	12.3	46.3	29.3	14.8	18.6	17.5	17.9	15.4	15.4	13.5	28	12.7	13.3	11.6	10
		17P062	16.9	-	28.7	25.2	36.5	25.1	18.3	35	26.1	22.7	14.3	16.1	11.5	30.7	15.8	15.7
		17P039	10.1	7.59	22.9	15.9	18.6	14	7.92	31.5	14.2	13.5	6.62	7.41	9.01	12.2	6.35	12
	HTLV-1p12KO	17P002	7.93	5.38	22.1	5.54	17	7.23	9.72	4.74	5.77	9.73	4.98	6.53	5.3	8.17	4.24	3.87
		15P062	7.58	6.22	18.4	25.2	20.7	6.47	5.24	10.7	6.76	10.5	7.83	8.49	11	18.1	7.58	8.74
		17P049	5.41	7.55	21.6	15.2	27	5.02	5.87	19.5	4.78	12.3	5.24	13.9	14	12.7	6.92	4.74
		17P037	8.82	16.4	23.1	19.6	29.7	9.09	14	-	11.2	13.4	8.52	8.36	11.1	13.6	7.47	7.93
		17P030	9.64	10.3	27.6	19.3	20.5	10.7	12.6	11.4	8.24	8.92	10.1	15.9	18.4	16.7	7.93	6.64
CD14+CD16+	HTLV-1WT	15P044	0.64	0.36	4.16	1.91	1.61	0.91	0.47	0.73	0.61	0.45	0.48	0.88	0.37	2.36	0.96	0.46
		18C266	1.23	0.68	2.98	0.68	1.35	0.16	0.095	0.11	0.19	0.11	0.17	0.31	0.48	1.45	0.063	0.064
		17P008	0.47	0.59	1.81	1.05	0.65	0.32	0.49	0.54	0.4	0.31	0.9	0.53	0.29	1.03	0.34	0.14
		17P062	0.38	-	2.41	1.18	1.25	0.26	0.38	0.41	0.53	0.35	0.39	0.44	0.2	2.53	0.27	0.068
		17P039	0.45	0.52	1.85	1.17	0.56	0.11	0.42	0.42	0.16	0.24	0.21	0.5	0.16	1.2	0.28	0.19
	HTLV-1p12KO	17P002	7.93	5.38	22.1	5.54	17	7.23	1.06	0.28	0.13	0.15	0.55	0.48	1.03	1.94	0.45	0.091
		15P062	7.58	6.22	18.4	25.2	20.7	6.47	0.38	0.4	0.23	0.15	0.36	0.25	0.032	2.24	0.3	0.22
		17P049	5.41	7.55	21.6	15.2	27	5.02	0.66	0.58	0.22	0.097	0.12	0.83	0.3	2.53	0.26	0.13
		17P037	8.82	16.4	23.1	19.6	29.7	9.09	0.69	-	0.28	0.21	0.39	0.17	1.48	2.97	0.53	0.092
		17P030	9.64	10.3	27.6	19.3	20.5	10.7	1.44	0.39	0.32	0.14	0.23	0.38	1.05	3.32	0.29	0.19
CD14-CD16+	HTLV-1WT	15P044	0.24	0.21	16.1	2.77	1.86	0.81	1.26	1.5	0.98	0.56	0.38	0.51	0.24	1.34	0.79	0.89
		18C266	0.11	0.092	2.68	3.63	1.79	0.96	0.56	0.62	0.4	0.59	0.51	0.6	0.13	1.54	0.71	0.93
		17P008	0.36	0.45	6.54	1.51	2.15	1.19	2.87	1.46	2.36	0.97	1.75	0.65	0.14	2.47	0.56	1.55
		17P062	0.14	-	2.02	0.88	1.29	0.56	0.61	0.78	0.45	0.78	0.99	0.7	0.21	3.43	0.48	0.59
		17P039	0.36	0.11	1.28	0.89	0.83	0.4	1.2	0.4	0.75	0.57	0.46	0.69	0.074	1.32	0.71	1.28
	HTLV-1p12KO	17P002	0.017	0.055	0.21	0.42	1.71	0.24	0.34	0.72	0.23	0.31	0.36	0.076	0.12	0.64	0.53	0.19
		15P062	0.11	0.79	9.03	2.77	3.52	1.63	0.73	1.38	0.45	1.18	0.65	0.58	0.062	3.54	0.7	1.76
		17P049	0.48	0.19	8.3	3.09	0.49	0.97	1.19	1.35	1.02	1.07	0.29	1.6	0.24	8.47	0.76	1.32
		17P037	1.55	0.11	0.98	1.4	0.83	0.86	0.82	-	0.48	0.29	0.42	0.13	0.22	1.59	1.38	0.72
		17P030	0.14	0.33	9.28	2.3	2.52	1.99	0.56	1.15	1.2	0.48	0.62	0.84	0.19	5.25	1.64	0.76
neutrophils	HTLV-1WT	15P044	50.5	65.8	83.8	79.3	89.9	70.3	74.1	80.1	81.1	65.2	58	82.7	86.1	52.2	65.6	52.8
		18C266	37.1	-	75.3	59.6	74.2	48.8	47.1	78.6	68.9	44	13.2	57.1	67.1	33.3	39.2	25.3
		17P008	41.4	64.8	86.4	77.3	53.3	68.2	59.1	64.5	59.1	39.3	37.3	84.5	80	41.1	62.2	44.3
		17P062	51.5	-	78.1	82.1	80.3	71.1	74.5	76.5	78.6	59.2	62.2	63.9	84.5	53.5	55.6	61.5
		17P039	55.6	69.9	78.8	79.5	86.8	72.4	70.8	85.8	77.8	68.2	41.5	73.6	81.2	33.1	46.3	55.7
	HTLV-1p12KO	17P002	25.1	57	72.8	80.5	76.1	75.3	78.2	50.4	62	67.9	41.8	58.2	77.1	29.8	36	29.8
		15P062	25.4	59.7	58.4	82.1	61	40.8	49.8	54.6	51.3	67.1	35.4	45.7	80.1	36.8	40.7	47
		17P049	36.5	66.4	71.9	83.6	82.6	46.4	63.7	66.2	55.4	76	51.5	72.9	86.3	42.7	62.9	47
		17P037	63.3	73.3	73.4	85.1	82.9	66.7	74.1	-	23.6	79.2	54.7	75.4	82.8	54.8	63.4	59.8
		17P030	26.2	52.2	60.5	64.3	59.7	45.4	53.6	37.7	30.4	35.4	39.4	49.4	80.2	42.7	36.3	35.1
