# Supplementary material for: Complete Rescue of HTLV-1p12KO Infectivity by Depletion of Monocytes Together with NK and CD8+ T Cells
Source: Pathogens. 2024 Mar 29;13(4):292. doi: 10.3390/pathogens13040292 (PMC11054408; doi:10.3390/pathogens13040292)
Supplement: Supplementary file 1 [file pathogens-13-00292-s001.zip › Table S4.xlsx]

## Sheet: Sheet1
Table S4. Changes in cytokine/chemokine levels.
cytokine/chemokine	group	animal ID	cytokine/chemokine level
			B.	week 2	week 5	week 7	week 16	week 21	B. (week 28)	week 31	week 33	week 35
IFNγ	HTLV-1WT	15P044	7.81	6.65	6.14	6.02	14.81	0	0	0	0	1.13
		18C266	18.12	27.9	33.85	20.72	57.6	24.2	3.18	0	0	0
		17P008	9.85	30.36	30.9	23.1	42.86	48.53	0	0	0	0
		17P062	11.51	13.54	15.1	36.44	33.09	24.89	0	0	0	0
		17P039	50.47	31.36	51	41.8	44.53	84.43	11.61	0	1.65	7.96
	HTLV-1p12KO	17P002	12.08	4.8	1.57	0.37	15.03	10.9	0	0	0	0
		15P062	10.27	7.98	7.12	2	7.54	10.66	0	0	0	0
		17P049	10.93	2.52	3.91	0.5	8.41	34.66	0	0	0	0
		17P037	1.45	15.97	23.28	2.58	23.11	7.54	0	0	0	0
		17P030	4.58	2.52	0.75	2.11	4.82	8.89	0	0	0	0
IL-1β	HTLV-1WT	15P044	0.75	0.57	1.26	1	1.99	0	0.68	0.44	1.02	1.87
		18C266	4.78	6.16	9.39	4.28	11.54	9.47	3.11	1.61	1.21	1.94
		17P008	2.33	7.74	8.9	3.77	12.98	12.05	1.92	1.73	1.63	1.55
		17P062	2.65	2.02	3.43	3.24	7.5	4.75	1.25	0.73	0.46	1.09
		17P039	2.47	7.24	9.55	6.49	10.74	16.32	4.28	2.48	2.78	4.28
	HTLV-1p12KO	17P002	1.94	0	0	0.64	0	1.64	0.58	0.51	0.46	0.44
		15P062	1.11	2.16	1.52	0.71	0	1.26	0.62	0.74	0.5	0.58
		17P049	1.46	0	0	0.54	1.26	6.99	0.58	1.35	0.46	0.51
		17P037	1.37	2.45	2.85	1.35	1.82	3.12	1.21	0.64	0.9	0.68
		17P030	0.2	0	0	0.76	0	0.77	0.73	0.64	0.7	0.75
IL-6	HTLV-1WT	15P044	4.39	2.1	4.96	1.98	12.24	0	0	0	0	1.02
		18C266	16.71	17.33	25.9	13.15	51.36	19.94	1.55	0.32	0	0.14
		17P008	9.75	19.72	37.25	14.11	50.86	51.97	0.65	0.51	0.72	0.25
		17P062	9.16	20.9	14.8	12.97	24.95	17.62	0	0.32	0	0
		17P039	9.49	12.8	20.04	16.33	40.02	57.11	4.79	3.42	0	2.83
	HTLV-1p12KO	17P002	7.58	48.84	25.42	52.1	13.73	8.97	0	0	0	0
		15P062	5.12	2.15	6.28	0.67	3.29	9.37	0	0	0	0
		17P049	8.89	8.36	12.93	4.37	5.53	30	0	0	0	0
		17P037	5.12	19.57	43.8	4.73	58.97	50.68	2.76	0	1.04	0.88
		17P030	3.87	0	2.59	2.04	5.7	3.9	0	0	0	0
IL-8	HTLV-1WT	15P044	124.67	131.42	79.63	117.38	101.93	59.15	48.57	139.72	106.38	146.22
		18C266	427.41	757.58	282.9	413.93	399.42	175.85	189.77	551.59	208.18	335.8
		17P008	257.53	345.75	166.63	447.23	177.26	151.14	317.82	173.77	544.78	275.76
		17P062	142.43	210.73	85.15	238.72	228.61	178.88	111.71	144.08	155.73	127.38
		17P039	930.26	969.97	204.04	892.42	270.49	825.58	1183.32	374.67	889.44	843.87
	HTLV-1p12KO	17P002	19.79	60.69	40.93	48.12	22.18	20.75	19.96	18.76	18.74	19.92
		15P062	45.09	77.62	56.41	68.03	30.88	40.79	11.54	113.2	117.26	31.14
		17P049	81.45	129.28	96.21	39.57	56.23	166.66	16.92	156.47	45.48	52.82
		17P037	169.11	331.27	185.53	222.7	111.1	103.8	115.19	358.48	436.92	280.8
		17P030	195.65	71.45	162.71	177.93	80.14	67.32	98.48	371.45	304.12	80.45
IL-10	HTLV-1WT	15P044	25.52	36.59	11.15	29.14	83.75	0	0	0	0	39.19
		18C266	105.89	217.81	162.78	135.56	304.49	149.32	79	28.52	24.64	39.19
		17P008	53.92	284.85	163.7	103.36	271.72	286.75	21.25	22.7	19.8	17.86
		17P062	66.94	118.08	73.24	132.98	222.4	118.74	19.8	11.56	0	7.69
		17P039	58.85	278.58	187.76	210.79	150.7	447.1	87.75	100.88	68.31	91.64
	HTLV-1p12KO	17P002	52.13	59.15	1.01	42.94	86.56	59.74	13.98	0	0	0
		15P062	40.99	96.48	27.72	38.64	32.58	36.9	0	8.17	7.21	0
		17P049	61.09	25.01	8.15	4.84	55.48	181.12	17.86	34.34	8.17	5.27
		17P037	4.33	143.77	38.77	17.81	104.78	87.96	63.94	21.73	42.1	33.37
		17P030	14.18	0	0	20.44	26.8	44.07	8.17	2.37	0	0.44
IL-12/23	HTLV-1WT	15P044	13.68	15.92	10.16	11.72	19.3	0	0	0	0	10.55
		18C266	60.31	135.4	98.7	96.7	124.23	82.22	40.32	10.55	7.46	24.42
		17P008	20.75	136.31	101.2	63.78	107.83	102.26	0	3.04	0	0
		17P062	48.01	59	38.64	84.22	60.66	43.75	0	0	0	0
		17P039	75.74	154.86	95.15	146.64	67.13	156.61	83.46	73.78	40.03	74.35
	HTLV-1p12KO	17P002	24.49	19.91	26.57	21.5	7.05	11.82	0	0	0	0
		15P062	6.9	30.53	0	11.29	51		0	0	0	0
		17P049	7.46	17.01	24.9	4.63	26.15	5.6	0	0	0	0
		17P037	11.54	9.14	9.95	8.22	25.57	8.87	0	0	0	0
		17P030	13.38	16.75	59.26	6.44	34.63	7.52	0	0	0	0
IL-13	HTLV-1WT	15P044	21.28	15.32	20.29	13.85	32.29	0	0	0	0	0
		18C266	37.7	50.61	55.22	40.51	76.46	45.96	6.8	0	0	0
		17P008	27.54	55.87	66.46	53.48	73.4	71.28	0	0	0	0
		17P062	30.36	30.52	37.11	46.91	47.21	41.93	0	0	0	0
		17P039	23.99	42.54	46.21	36.75	30.97	63.45	15.46	0	0	14.5
	HTLV-1p12KO	17P002	23.25	13.88	9.03	3.87	21.68	26.68	0	0	0	0
		15P062	24.22	25.48	23.99	7.96	20.15	26.5	0	0	0	0
		17P049	26.59	6.84	17.43	3.54	21.19	56.75	0	0	0	0
		17P037	26.38	28.92	33.18	10.75	39.6	31.86	0	0	0	0
		17P030	16.9	0	11.04	8.97	18.16	17.84	0	0	0	0
IL-18	HTLV-1WT	15P044	86.95	23.36	44.49	0	115.8	0	0	0	0	13.65
		18C266	214.34	133.74	359.03	101.96	424.56	279.68	20.48	0	0	0
		17P008	116.86	104.01	299.72	41.47	431.12	449.72	0	0	0	0
		17P062	139.33	34.73	176.59	77.6	366.95	264.8	0	0	0	0
		17P039	227.15	109.66	442.93	171.7	343.82	655.04	54.47	0	11.27	40.55
	HTLV-1p12KO	17P002	117.94	0	0	0	117.61	104.43	0	0	0	0
		15P062	80.08	18.57	75.76	0	42.96	108.31	0	0	0	0
		17P049	142.21	0	46.6	8.68	62.55	398.37	0	0	0	0
		17P037	99.66	65.14	190.24	0.74	170.66	0	0	0	0	0
		17P030	0	0	0	0	0	0	0	0	0	0
MIP-1β	HTLV-1WT	15P044	72.95	0	44.91	8.23	10.92	5.79	14.72	15.99	17.67	15.53
		18C266	84.2	20.42	120.25	15.38	31.14	19.47	53.39	25.87	32.09	24.28
		17P008	101.77	25.85	119.61	19.11	18.34	20.95	24.71	29.34	35.42	26.03
		17P062	44.64	14.59	49.19	12.02	10.64	7.26	12.88	25.64	21.33	18.35
		17P039	241.42	51.71	303.63	81.21	30.96	53.07	62.56	62.23	59.06	60.37
	HTLV-1p12KO	17P002	61.56	16.91	73.37	13.41	13.56	12.2	18	17.94	21.22	19.77
		15P062	64.33	24.06	124.76	25.27	13.6	10.5	19.26	23.04	117.61	60.54
		17P049	101.48	0	16.06	5.5	20.3	14.79	21.38	30.05	32.88	26.47
		17P037	45.04	21.06	68.78	16.17	14.1	8.98	27.15	25.27	25.69	25.98
		17P030	60.89	7.2	36.29	9.51	15.49	9.3	17.42	16.66	19.05	15.38
MIP-1α	HTLV-1WT	15P044	147.56	5.94	126.73	13.79	37.17	6.11	9.44	7.16	9.44	24.13
		18C266	227.75	28.25	271.28	35.95	58.77	49.02	28.31	12.72	6.86	16.69
		17P008	170.06	29.14	261.89	30	60.57	62.15	22.71	22.12	22.32	20.03
		17P062	176.74	15.59	181.28	33.13	54.27	48.81	15.89	8.5	17.08	12.55
		17P039	206.78	31	287.6	51.32	63.86	72.36	41.04	27.09	26.34	36.04
	HTLV-1p12KO	17P002	160.26	4.4	70.98	0	32.13	32.27	6.22	0	0	0
		15P062	150	10.44	143.77	7.89	29.16	34.3	0	9.44	3.14	2.42
		17P049	165.02	0	141.16	0	32.13	53.85	14.91	12.89	5.88	8.25
		17P037	112.92	21	202.38	16.32	49.02	28.29	21.1	15.89	19.02	17.71
		17P030	137.08	0	111	13.53	31.39	34.04	21.92	15.34	16.82	16.43
sCD40L	HTLV-1WT	15P044	70.68	114.25	67.5	16.46	72.57	39.84	0	38.39	10.31	151.31
		18C266	93.72	329.29	314.49	115.22	942.04	131.83	97.99	71.71	11.54	42.06
		17P008	71.62	243.3	139.81	138.1	236.21	233.76	10.31	37.33	11.84	0.29
		17P062	91.47	114.25	82.24	213.17	168.1	94.19	8.74	24.04	0	0
		17P039	245.24	706.12	558.13	424.12	737.75	249.1	191.8	119.3	41.8	322.01
	HTLV-1p12KO	17P002	73.49	70.04	26.1	9.9	36.2	45.4	0	5.82	0	0
		15P062	53.99	65.61	55.76	22.78	29.72	55.12	0	28.46	15.15	0
		17P049	73.18	132.69	65.23	14.48	44.4	171.08	0	86.89	8.42	0
		17P037	67.17	179.73	115.2	43.42	122.76	57.48	18.65	39.96	3.77	3.06
		17P030	97.6	34.52	103.59	65.86	53.69	54.17	3.77	100.8	69.27	5.82
TNFα	HTLV-1WT	15P044	54.17	30.25	41.04	69.47	60.95	0	0	0	0	0
		18C266	164.72	192.44	319.89	262.46	195.38	93.84	3.94	0	0	0
		17P008	79.56	225.68	289.94	180.18	180.13	207.35	0	0	0	0
		17P062	106	67.47	116.91	187.13	116.8	105.81	0	0	0	0
		17P039	88.61	256.63	342.3	462.99	162.71	379.29	153.6	0	0	124.73
	HTLV-1p12KO	17P002	55.48	18.71	6.79	0	28.98	40.37	0	0	0	0
		15P062	56.79	40.83	58.1	4.85	24.6	33.29	0	0	0	0
		17P049	71.13	10.02	29.77	2.09	28.01	150.85	0	0	0	0
		17P037	29.77	96.47	143.74	53	112.58	57.8	0	0	0	0
		17P030	39.05	1.74	6.1	29.53	24.1	32.34	0	0	0	0
